# Supplementary material for: Human Nanoplatelets as Living Vehicles for Tumor-Targeted Endocytosis In Vitro and Imaging In Vivo
Source: MDPI journal article supplement (doi:10.3390/jcm12041592), 2023-02-17
Supplement: s1 [file s1]

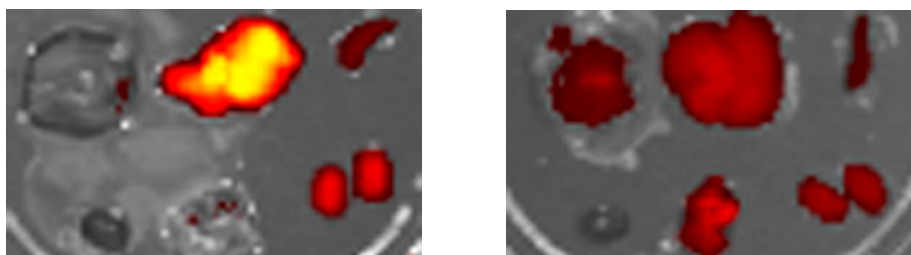

**Supplementary Figure S1.** The kinetics of nanoplalelets distribution upon injection into mice bearing sub-cutaneous RPMI8226 tumors. Cy7-fluorescence images of the main organs in mice injected with control Cy7-coupled nanoplalelets without transferrin (**left**), as in Figure 5a, or Cy7- and transferrin-coupled nanoplalelets (**right**), as in Figure 5b. From left to right, the organs above are tumor, liver and spleen, respectively, and the organs below are heart, lung and kidney, respectively.
